# Supplementary material
Source: ML conference proceedings conference paper supplement (https://proceedings.mlr.press/v139/gentzel21a.html)
Supplement: Supplementary file 1 [file gentzel21a-supp.pdf]

# Supplementary Material

June 11, 2021

## 1. Proof of Theorem 1

**Proof.** We denote the treatment for unit  $i$  by  $T_i$  and selected treatment based on the biasing covariates by  $T_i^s$ . For every unit  $i$  and any treatment  $t$ , the biasing covariates  $C_i^b$  are used to probabilistically select a treatment with probability  $P(T_i^s = t | C_i^b)$ .

$$P_{D_{OSAPO}}(T_i = t) = P(T_i = t)P(T_i^s = t | C_i^b) \quad (1)$$

$$= 1 * P(T_i^s = t | C_i^b) \quad (2)$$

$$P_{D_{OSRCT}}(T_i = t) = P(T_i = t)P(T_i^s = t | C_i^b) \quad (3)$$

$$= 0.5 * P(T_i^s = t | C_i^b) \quad (4)$$

Sub-sampling  $D_{OSAPO}$  uniformly at random is equivalent to multiplying  $P_{D_{OSAPO}}(T_i = t)$  by a scaling factor,  $s$ . When  $s = 0.5$ ,  $P_{D_{OSRCT}}(T_i = t) = P_{D_{OSAPO}}(T_i = t)$ .  $\square$

## 2. Proof of Theorem 2

*Proof.* Assume binary treatment  $T \in \{0, 1\}$ . For any unit  $i$  with biasing covariates  $C_i^b$ , let  $P(T_i = t) = p_t$ ,  $P(T_i^s = t | C_i^b) = p_{T_i^s=t|c^b}$ , and  $n = |D_{RCT}|$ . Indices are omitted when clear from context.

$$\begin{aligned} P(i \in D_{OSRCT}) &= p_1 p_{T_i^s=1|c^b} + p_0 p_{T_i^s=0|c^b} \\ &= p_1 p_{T_i^s=1|c^b} + (1 - p_1)(1 - p_{T_i^s=1|c^b}) \\ &= 2p_1 p_{T_i^s=1|c^b} - p_1 - p_{T_i^s=1|c^b} + 1 \\ E[|D_{OSRCT}|] &= \sum_{i=1}^n [2p_1 p_{T_i^s=1|c^b} - p_1 - p_{T_i^s=1|c^b} + 1] \\ &= n - n p_1 + (2p_1 - 1) \sum_{i=1}^n p_{T_i^s=1|c^b} \end{aligned}$$

If either  $p_1 = 0.5$  or  $\sum_{i=1}^n p_{T_i^s=1|c^b} = 0.5n$ ,  $E[|D_{OSRCT}|] = 0.5n$ .  $\square$

## 3. Using the Complementary Sample for Evaluation

One challenge when evaluating causal inference methods on their ability to estimate unit-level effects of interventions is the need for a held-out test set. The constructed observational data is constructed by sub-sampling the original

RCT data. This means that evaluating on all of the RCT data may produce a biased result by testing on a superset of the training data. One potential solution is to divide the RCT data into separate training and test sets. However, since OSRCT necessarily reduces the size of the training data by sub-sampling, the extra requirement of holding out a test set limits the number of RCTs that can be used, since not all randomized experiments will have enough data to learn effective models after two rounds of sub-sampling.

A more data-efficient approach is to use the data rejected by the biased sub-sampling. OSRCT sub-samples RCT data to create a probabilistic dependence between the biasing covariates and treatment. Based on the values of the biasing covariates, a treatment is selected for every unit. If that treatment is present in the data, the unit is included in the sample; otherwise the unit is rejected. This rejected sample (which we call the *complementary sample*) also has a causal dependence from the biasing covariates to treatment. The only difference is that the form of that dependence is the complement of that for the accepted sample, such that covariate values that lead to a high probability of treatment in the accepted sample would lead to a low probability of treatment in the complementary sample. Because we know the functional form of this induced bias, we can weight the data points in the complementary sample according to their probability of being included in the accepted sample. In aggregate, this type of weighting allows the complementary sample to approximate the distribution of the training data, and thus be used for testing. This is equivalent to inverse propensity score weighting (Rosenbaum & Rubin, 1983).

**Theorem 3.** For binary treatment  $T \in \{0, 1\}$ , biasing covariates  $C^b$ , outcome  $Y$ , estimated outcome  $\hat{Y}$ , biased sample  $D_{OSRCT}$  and complementary sample  $\bar{D}_{OSRCT}$ , let  $p_s = P(T_i^s = t_i | C_i^b)$ . Then,  $E[\hat{Y} - Y]$  for  $D_{OSRCT} = E[(\hat{Y} - Y) \frac{p_s}{1-p_s}]$  for  $\bar{D}_{OSRCT}$ .

*Proof.* For  $D_{OSRCT}$ ,

$$E[\hat{Y} - Y]_{D_{OSRCT}} = E[P(T_i^s = t_i | C_i^b)(\hat{Y}_i - Y_i)]$$

For  $\bar{D}_{OSRCT}$ ,

$$E[\hat{Y} - Y]_{\bar{D}_{OSRCT}} = E[(1 - P(T_i^s = t_i | C_i^b))(\hat{Y}_i - Y_i)]$$

If we weight the outcome estimates for  $\bar{D}_{OSRCT}$  by  $\frac{P(T_i^s = t_i | C_i^b)}{1 - P(T_i^s = t_i | C_i^b)}$ ,

$$\begin{aligned} E[\hat{Y} - Y]_{\bar{D}_{OSRCT}} &= E\left[\frac{P(T_i^s = t_i | C_i^b)}{1 - P(T_i^s = t_i | C_i^b)} \cdot \right. \\ &\quad \left. (1 - P(T_i^s = t_i | C_i^b))(\hat{Y}_i - Y_i)\right] \\ &= E[P(T_i^s = t_i | C_i^b)(\hat{Y}_i - Y_i)] \\ &= E[\hat{Y} - Y]_{D_{OSRCT}} \end{aligned}$$

□

#### 4. Experimental Evaluation of Theorems 1 and 3

Intuitively, the procedure outlined in Algorithm 2 works because treatment is *randomly* assigned in RCTs. The data is sub-sampled based solely on the value of a probabilistic function of the biasing covariates, which selects a value of treatment for every unit  $i$ . Since the observed treatment is randomly assigned, it contains no information about any of  $i$ 's covariates. The only bias introduced by this sub-sampling procedure is the intended bias: a particular form of causal dependence from  $C^b$  to  $T$ .

To assess OSRCT's effectiveness at approximating APO data, we performed an experiment using an APO data set provided by Gentzel et al. (2019), replicating their experimental setup. In this data, units are Postgres queries, interventions are Postgres settings (such as type of indexing), covariates are features of queries (such as the number of joins or the number of rows returned), and outcomes are measured results of running the query (such as runtime). If the Postgres database is queried in a recoverable manner, the same query can be run repeatedly while varying the treatment, creating APO data. For this analysis, consistent with Gentzel et al. (2019), we chose runtime as the outcome, indexing level as the treatment, and the number of rows returned by the query as the biasing covariate.

To compare RCT and APO data, We converted the APO Postgres data into RCT-style data by randomly sampling a single treatment for every unit. We then created constructed observational data from both the original APO data and the RCT-style data, creating  $D_{OSAPO}$  and  $D_{OSRCT}$ . For  $D_{OSRCT}$ , as described in Theorem 3, outcome estimation was evaluated by weighting the errors in the complementary sample. However, in  $D_{OSAPO}$ , no complementary sample is created, since the selected treatment is guaranteed to be observed for every unit. Instead, we can divide  $D_{OSAPO}$  into training and test sets. If the RCT-style data is created by sub-sampling treatments equally, by Theorem 2, splitting  $D_{OSAPO}$  in half leads to a data set approximately the same size as  $D_{OSRCT}$ , allowing for comparison with equal training set size. We estimated errors over 100 trials. Results are

shown in Figure 1.

Results are very similar for the APO data and the RCT-style data constructed from it. Consistent with Theorem 1, this suggests that evaluation with OSRCT data produces equivalent results to OSAPO data. In addition, consistent with Theorem 3, the similarity in outcome estimates suggests that weighting the complementary sample produces equivalent results to an unweighted held-out test set.

#### 5. Details about RCT Repositories

We selected data sets from six repositories: (1) Dryad (Dryad, 2020); (2) the Yale Institution for Social and Policy Studies Repository (Yale Institution for Social and Policy Studies Data Archive, 2020); (3) the NIH National Institute on Drug Abuse Data Share Website (NIH National Institute on Drug Abuse Data Share Website, 2020); (4) the University of Michigan's ICPSR repository (University of Michigan Institute for Social Research, 2020); (5) the UK Data Service (UK Data Service, 2020); and (6) the Knowledge Network for Biocomplexity (The Knowledge Network for Biocomplexity, 2020). These repositories were selected because they contained RCT data, were reasonably well-documented, and had a simple access process. None of these repositories house RCT data exclusively, so some search and filtering was necessary to identify relevant data sets.

Many other repositories exist that contain RCT data but have higher access restrictions. Access to these repositories generally involves requesting permission for any desired data set. For some, this request only involves submitting a brief description of the intended use and proving sufficient credentials. For others, this request may require a detailed data analysis plan and description of the benefits of the research. Examples include the National Institute of Diabetes and Digestive and Kidney Diseases (National Institute of Diabetes and Digestive and Kidney Diseases (NIDDK) Central Repository, 2020), Vivli (Vivli Center for Global Clinical Research Data, 2020), The National Institute of Mental Health Data Archive (The National Institute of Mental Health Data Archive (NDA), 2020), Project Data Sphere (Project Data Sphere, 2020), and the Data Observation Network for Earth (Data Observation Network for Earth, 2020).

#### 6. Details about RCT Data Sets Used in Demonstration

The data sets used in the demonstration came from six repositories, all of which allowed for direct download of the data after registering with the repository. Each of these data sets met five criteria:

**Random assignment:** Treatment must be fully random-

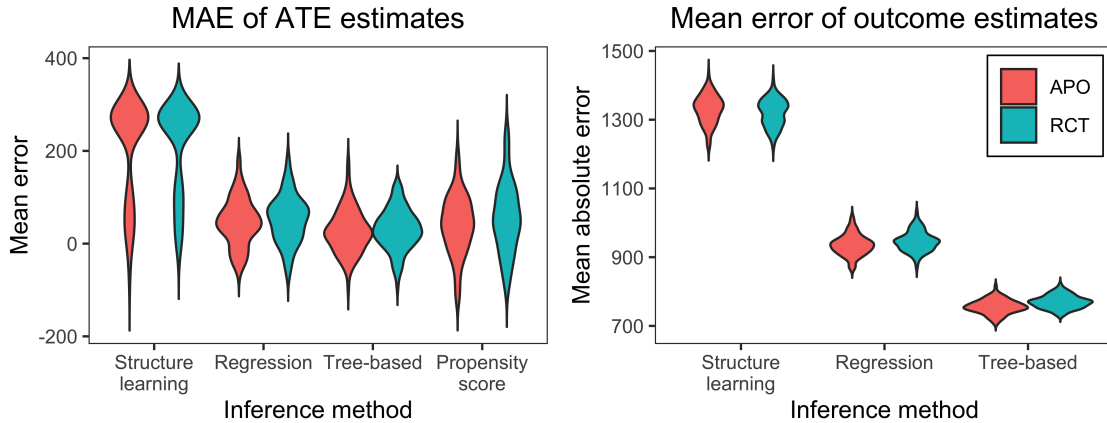

Figure 1: APO vs RCT sampling on Postgres data. *Left*: Mean absolute error of ATE estimates, *Right*: Mean error of estimated outcomes. The similarity between the RCT and APO data sets suggests that OSRCT and OSAPO produce equivalent constructed observational data.

ized for OSRCT to work as intended. We ensured that the selected data sets were created by randomly assigning treatment to each unit.

**Independent units:** Many causal inference methods assume independent data instances, so we ensured that the units in the data sets could reasonably be assumed independent (e.g., no spatial correlation).

**Measured pre-treatment covariate:** At least one measured pre-treatment covariate is necessary to induce confounding bias. The data sets we selected all had multiple pre-treatment covariates, allowing us to select one that was correlated with outcome to induce confounding bias.

**Reasonably large sample size:** Many RCT data sets are very small ( $N < 100$ ). We selected only reasonably large data sets ( $N > 500$ ).

**Ease of use:** Some data sets were poorly documented or stored the data over many files. We selected data sets that would require minimal pre-processing.

In cases where treatment was not binary, a reasonable binary version of treatment was constructed, either by grouping merging treatment categories or by selecting a subset of the data with only two values of treatment. Details about these data sets are given in Table 1.

We also used some additional data set for the evaluation: synthetic-response data sets from the ACIC Competition and the IBM Causal Inference Benchmarking Framework (Dorie et al., 2019; Shimoni et al., 2018), APO data sets from computational systems (Gentzel et al., 2019), and three simulators (Guillaume & Rougemont, 2006; Tu et al., 2019; Miller et al., 2020). Details about these data sets can be

found in Tables 1, 2, and 3. For the experimental results presented in the paper, 5000 samples were used for the IBM Causal Inference Benchmarking Framework data sets, rather than 2000, due to the high number of covariates.

## 7. Details about Causal Inference Methods Evaluated

For each causal inference method evaluated, we used the default implementation. While it may be possible to achieve better performance for some of these methods after parameter tuning, we focused our evaluation on default performance rather than best-case. Many practitioners looking to apply a causal inference method will default to using the initial parameter settings of a method, so it is a useful case to compare. Our comparison also includes 37 data sets, and individually tuning parameters for seven algorithms across 37 data sets was beyond the scope of this paper. A deep dive into the performance of any individual causal inference method, varying parameter settings and implementation details, is a possible avenue for future work and could produce interesting results.

**Propensity-score matching (PSM)** learns a model of treatment probability that is used to produce samples with equal probabilities of treatment. Then weighted outcome estimates of the treatment and control populations are compared to estimate ATE. PSM was implemented using the *MatchIt* package in R.

**Inverse probability of treatment weighting (IPTW)** is similar to propensity score matching, in that both estimate the probability of treatment and use that to control for confounding. Rather than using the probability of treatment to match individuals between the treatment and control pop-

Table 1: Data sets used in experiments. ‘ID’ denotes the repository-specific ID for each data set, where applicable. ‘Coding’ denotes the shortened data set name used in figures.

| Source           | ID        | Coding | Sample Size | Num Covars | Treatment             | Outcome                | Biasing Covar          |
|------------------|-----------|--------|-------------|------------|-----------------------|------------------------|------------------------|
| Dryad            | 4f4qrfj95 | RCT-1  | 6453        | 27         | Temperature           | Plant health           | Species                |
| Dryad            | B8KG77    | RCT-2  | 15289       | 4          | Video type            | Bicycle rating         | Bike access            |
| HDV              | WT4I9N    | RCT-3  | 551         | 5          | Fact truth            | Fact removed           | Fact cited             |
| ICPSR            | 20160213  | RCT-4  | 5573        | 10         | Guest race            | Accepted               | Prior black tenants    |
| ICPSR            | 23980     | RCT-5  | 10098       | 7          | Age                   | Resume response        | Volunteer service      |
| ISPS             | d037      | RCT-6  | 4859        | 2          | Race                  | Legislator response    | Party                  |
| ISPS             | d084      | RCT-7  | 48509       | 6          | E-mail source         | Voter turnout          | Prior election turnout |
| ISPS             | d113      | RCT-8  | 10200       | 4          | Mailing               | Voter turnout          | Gender                 |
| KNB              | 1596312   | RCT-9  | 760         | 4          | Soil heating          | CO2 levels             | Depth                  |
| KNB              | f1qf8r51t | RCT-10 | 8063        | 4          | Plant protection      | Plant survival         | Location               |
| musiclab         | -         | RCT-11 | 3719        | 13         | peer-influence        | average rating         | music knowledge        |
| NIDA             | P1S1      | RCT-12 | 776         | 5          | Nicotine levels       | Cigarettes per day     | Weight                 |
| UK Data Service  | 852874    | RCT-13 | 343         | 5          | Shown video           | Response               | Ethnicity              |
| UK Data Service  | 853369    | RCT-14 | 4210        | 3          | Biasing instruction   | Line-up identification | Recruitment method     |
| UK Data Service  | 854092    | RCT-15 | 691         | 5          | Fact check validity   | Reaction               | Political activity     |
| JDK              | -         | APO-1  | 473         | 5          | Obfuscate             | Num bytecode ops       | Test javadocs          |
| Networking       | -         | APO-2  | 2599        | 1          | Proxy                 | Elapsed time           | Server class           |
| Postgres         | -         | APO-3  | 11128       | 8          | Index level           | Runtime                | Rows returned          |
| Nemo             | -         | Sim-1  | 10000       | 9          | Breeding              | Adult viability        | Deleterious loci       |
| Nemo             | -         | Sim-2  | 10000       | 9          | Deleterious model     | Deleterious frequency  | Mutation rate          |
| Nemo             | -         | Sim-3  | 10000       | 10         | Dispersal rate        | Survival               | Deleterious loci       |
| Neuropathic pain | -         | Sim-4  | 10000       | 25         | DLS L4-L5             | Lumbago                | DLS L5-S1              |
| Neuropathic pain | -         | Sim-5  | 10000       | 25         | DLS C5-C6             | Right Skull pain       | DLS C3-C4              |
| Neuropathic pain | -         | Sim-6  | 10000       | 25         | DLS C4-C5             | Right Shoulder pain    | DLS C6-C7              |
| Whynot           | opiod     | Sim-7  | 10000       | 3          | Abuse                 | Overdose deaths        | Illicit users          |
| Whynot           | world2    | Sim-8  | 10000       | 6          | Capital investment    | Population             | Pollution              |
| Whynot           | zika      | Sim-9  | 10000       | 9          | Zika control strategy | Symptomatic humans     | Exposed mosquitoes     |

ulations, IPTW *weights* the outcomes of every individual according to their probability of treatment and uses these weighted outcomes to estimate ATE (Rosenbaum & Rubin, 1983).

**Outcome regression** is one simple approach for effect estimation that models outcome given treatment and all measured covariates. Unlike the potential outcomes approaches discussed above, outcome regression makes no attempt to model the treatment mechanism, focusing solely on effectively modeling outcome. Recent studies have suggested that effectively modeling outcome may be more important than trying to account for differences in treatment assignment (Dorie et al., 2019).

**Bayesian Additive Regression Trees (BART)** use a tree-based model to estimate the response surface, allowing for estimation of both ATE and individual outcomes (Chipman et al., 2007). Regression trees are a type of tree used when the outcome is continuous, which partition the input data into subgroups with similar outcomes. BART creates an ensemble of sequentially-learned regression trees, with a

regularization prior to keep the effects of individual trees small. Estimates for the ensemble are obtained by summing the outputs of all the trees. When used for causal modeling, all observed covariates and treatment are used as predictors of outcome, and estimates of ATE can be obtained by estimating outcome for all individuals with both  $T = 1$  and  $T = 0$  and calculating the mean difference. BART was implemented using the *bartMachine* R package.

**Causal forests** are random forests that specifically estimate ATE (Wager & Athey, 2017). They make use of causal trees (Athey & Imbens, 2016), which estimate ATE at the leaf nodes by splitting such that the the number of training points at the leaf node is small enough to be treated as though they came from a randomized experiment. A causal forest then averages the ATE estimates from the causal trees in the ensemble to get an overall estimate of ATE. This was implemented using the *grf* R package, with the default parameters.

The above methods focus on modeling either treatment or outcome. However, if this model is misspecified, the effect

Table 2: ACIC Data sets used in experiments. ‘ID’ denotes the ACIC ID for each data set. ‘Coding’ denotes the shortened data set name used in figures.

| ID | Coding | Sample Size | Num Covars | Treatment Function | Percent Treated | Outcome Function | Alignment | Treatment Effect Heterogeneity |
|----|--------|-------------|------------|--------------------|-----------------|------------------|-----------|--------------------------------|
| 4  | SR-1   | 4802        | 56         | Polynomial         | 35%             | Exponential      | 75%       | high                           |
| 27 | SR-2   | 4802        | 56         | Polynomial         | 35%             | Step             | 25%       | Medium                         |
| 47 | SR-3   | 4802        | 56         | Polynomial         | 65%             | Exponential      | 75%       | High                           |
| 65 | SR-4   | 4802        | 56         | Step               | 65%             | Step             | 75%       | Medium                         |
| 71 | SR-5   | 4802        | 56         | Step               | 65%             | Step             | 25%       | High                           |

Table 3: IBM Data sets used in experiments. ‘ID’ denotes the IBM ID for each data set. ‘Coding’ denotes the shortened data set name used in figures.

| ID                               | Coding | Sample Size | Num Covars | Percent Treated | Effect Size | Link Type   |
|----------------------------------|--------|-------------|------------|-----------------|-------------|-------------|
| 1b50aae9f0e34b03bdf03ac195a5e7e9 | SR-6   | 10000       | 151        | 69%             | -3.2        | Polynomial  |
| 2b6d1d419de94f049d98c755beea4ae2 | SR-7   | 10000       | 151        | 23%             | -0.13       | Log         |
| 19e667b985624159bae940919078d55f | SR-8   | 10000       | 151        | 17%             | 0.06        | Exponential |
| 7510d73712fe40588acdb129ea58339b | SR-9   | 10000       | 151        | 27%             | 0.017       | Log         |
| c55cbee849534815ba80980975c4340b | SR-10  | 10000       | 151        | 19%             | -0.23       | Exponential |

estimate will be biased. **Doubly-robust methods** are designed to avoid this issue, producing an unbiased estimate of ATE as long as either the treatment or the outcome model is correctly specified. This is commonly implemented as a combination of IPTW weighting and outcome regression (Funk et al., 2011). Doubly-robust estimation was implemented using the *fastDR* R package.

Shi et al. (Shi et al., 2019) propose a neural-network-based method, using a new proposed architecture called **Dragonnet**. This approach uses a deep neural network to produce a representation layer of the covariates. This representation layer is then used to predict both treatment and outcome. The prediction of treatment acts as a propensity score, which is used to adjust for confounding when estimating treatment effect. Dragonnet net is one example of a class of neural-network-based approaches for causal modeling, which generally follow a similar approach. (Johansson et al., 2016; Shalit et al., 2017; Schwab et al., 2018; Louizos et al., 2017; Yoon et al., 2018)

## 8. Additional results

### 8.1. Neural-network results

We also ran experiments comparing against a neural-network-based method (Shi et al., 2019).<sup>1</sup> This method

<sup>1</sup>We tried neural-network method implementations by Shi et al.: Dragonnet, Dragonnet + TMLE, Tarnet, and Tarnet+TMLE. The performance was comparable between all four, so only results for Dragonnet+TMLE are reported.

has significantly higher variability than the other methods. There are a couple of possible explanations for this. As we initialize different random weights in each run, the model might be sensitive to the initialization weights and converge to different local optima. In addition, sample size for most of the data sets is less than 5000, which is significantly lower than is typically used for neural network based methods. This might be causing overfitting and high variability. We ran the neural network method using the experimental set up described in the main paper, (as in Figures 3 and 4 in the main paper). The results are shown in Figures 2 and 3.

### 8.2. Outcome estimation results

For APO data sets and synthetic response data sets, a held out test set can be used instead, which, by Theorem 3, is equivalent to using the weighted complementary sample. However, many of the algorithms we are evaluating here are not capable of producing individual-level outcome estimates, so this evaluation is limited to only BART, outcome regression., and the neural-network method. Results for data sets with binary outcomes are shown in Figure 4, and results for data sets with continuous outcomes are shown in Figure 5. (Figure 6 contains the continuous outcome results but zoomed in, cutting off some extreme neural network results to show details).

Unsurprisingly, BART consistently outperforms outcome regression. Both of these methods focus on modeling the response surface, but BART uses a higher capacity tree-based model rather than a simple regression. The difference

275  
276  
277  
278  
279  
280  
281  
282  
283  
284  
285  
286  
287  
288  
289  
290  
291  
292  
293  
294  
295  
296  
297  
298  
299  
300  
301  
302  
303  
304  
305  
306  
307  
308  
309  
310  
311  
312  
313  
314  
315  
316  
317  
318  
319  
320  
321  
322  
323  
324  
325  
326  
327  
328  
329

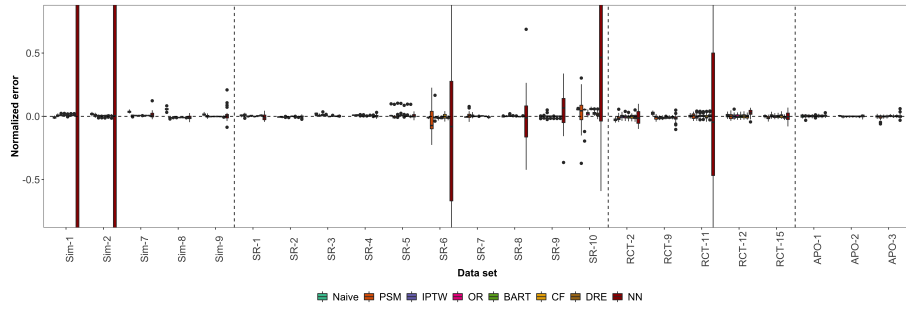

Figure 2: Normalized error in estimating ATE for data sets with continuous outcome

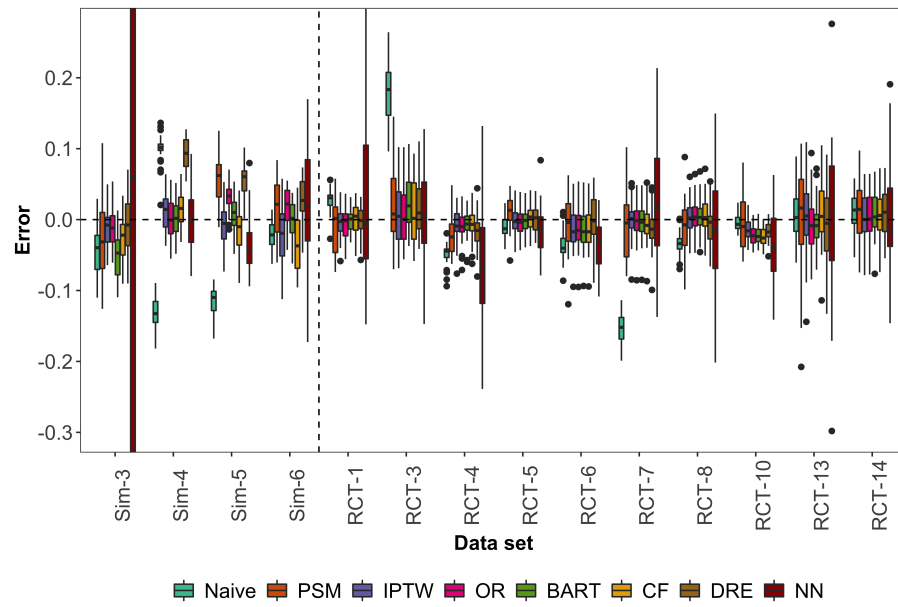

Figure 3: Error in estimating risk difference for data sets with binary outcome

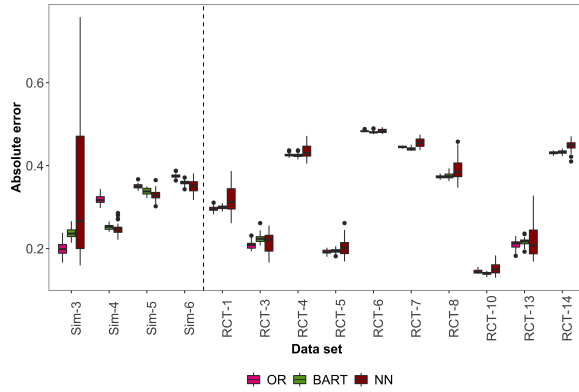

Figure 4: Error in estimating a binary outcome

is far stronger for data sets with a continuous outcome, compared to those with a binary outcome. The difference is also minimal for the RCT data sets. This trend is constant as we increase the strength of the biasing and when two biasing covariates are used. The neural network has significantly higher variability than BART and outcome regression. Since no hyperparameter tuning was performed for the neural-network method, and many data sets have low sample size, it is not surprising that the neural-network method sometimes does very poorly. However, in many cases, the mean error is similar, and for many data sets with continuous outcome, performance is equivalent to BART and outcome regression. This evaluation is unfortunately limited since none of the other algorithms we evaluated are capable of producing individual-level outcome estimates. In general, methods that model outcome are more likely to provide this as an option, making this a useful evaluation tool when comparing multiple outcome estimation-based methods.

### 8.3. Comparison between Sub-sampling and Weighting

An alternative approach to sub-sampling, as mentioned in Section 2.1 of the paper, is to reweight the units, according to  $P(T_i^s = t_i | C_i^b)$ . This approach requires that the causal inference method under evaluation accepts unit-level weights. Among the methods we used for evaluation, only *causal forests* and *outcome regression* accept unit-level weights. To assess the similarity between the two approaches, we compared the causal effect estimates obtained using sub-sampling to those obtained using weighting. Results for binary outcomes can be seen in Figure 7, and results for continuous outcomes can be seen in Figure 8. Naive, OR-subsampled, CF-subsampled estimates are calculated using the sub-sampling approach, while OR-weighted and CF-weighted estimates are calculated using the weighting approach. We observe that the weighted estimates have low (almost zero) variability across different runs. This is expected as the weighting approach uses all the units for cal-

culating estimates, and biasing function used in the experiments produces deterministic probabilities. The variability in sub-sampled estimates comes from sub-sampling different samples of data in every run. Overall, we see that the estimates for weighting estimates are in the range of the estimates obtained by sub-sampling, suggesting an overall equivalence of the approaches.

### 8.4. Correlation Analysis

While the ranges of variability for most methods are the same, this doesn't guarantee that each method is producing the same result for each of the 30 trials. Error for each method could be uncorrelated with the others, suggesting that an ensemble approach might improve performance. To test this, we computed a correlation matrix for each data set, calculating correlation across the 30 trials for each method. Results for a few representative data sets are shown in Figure 9. In most cases, the correlation is the weakest with the neural network method, and is generally weaker with propensity score matching. For all other methods, though, errors are highly correlated. There are some exceptions, as in SR-7. The reason for these varies. In the case of SR-7, this is likely a result of the low variability across the 30 trials.

### 8.5. Overall Mean

Figure 10 shows overall mean performance for each algorithm. As observed above, propensity score matching has the highest error overall. In addition, doubly-robust estimation appears to have higher error for data sets with binary outcomes. More nuance can be seen in Figure 11, which shows mean error by data source. The higher error for doubly robust estimation appears to be primarily for simulator data sets. For the other data sources, mean performance is fairly consistent across algorithms.

## References

- Athey, S. and Imbens, G. Recursive partitioning for heterogeneous causal effects. *Proceedings of the National Academy of Sciences*, 113(27):7353–7360, 2016.
- Chipman, H. A., George, E. I., and McCulloch, R. E. Bayesian ensemble learning. In *Advances in Neural Information Processing Systems*, pp. 265–272, 2007.
- Data Observation Network for Earth, 2020. URL <https://www.dataone.org/>. [Online; accessed 3-June-2020].
- Dorie, V., Hill, J., Shalit, U., Scott, M., and Cervone, D. Automated versus do-it-yourself methods for causal inference: Lessons learned from a data analysis competition. *Statistical Science*, 34:43–68, 2019.

385  
386  
387  
388  
389  
390  
391  
392  
393  
394  
395  
396  
397  
398  
399  
400  
401  
402  
403  
404  
405  
406  
407  
408  
409  
410  
411  
412  
413  
414  
415  
416  
417  
418  
419  
420  
421  
422  
423  
424  
425  
426  
427  
428  
429  
430  
431  
432  
433  
434  
435  
436  
437  
438  
439

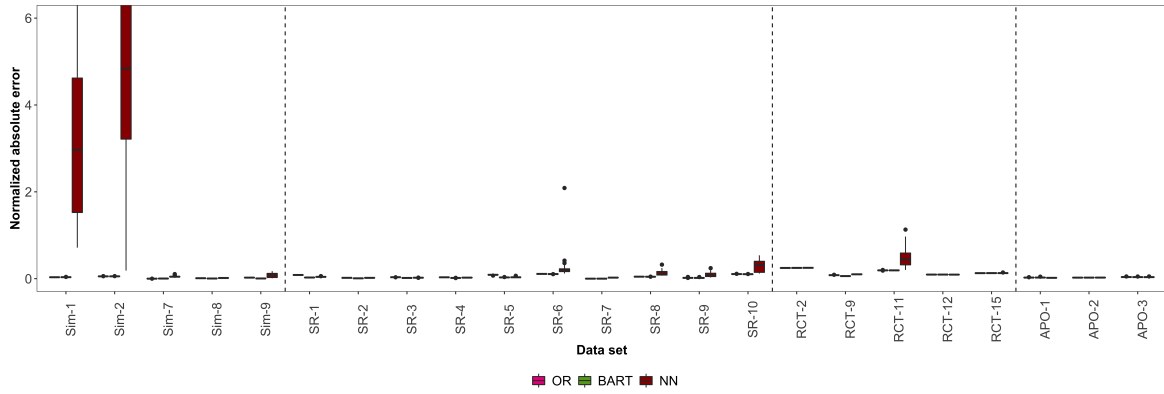

Figure 5: Normalized absolute error in estimating a continuous outcome

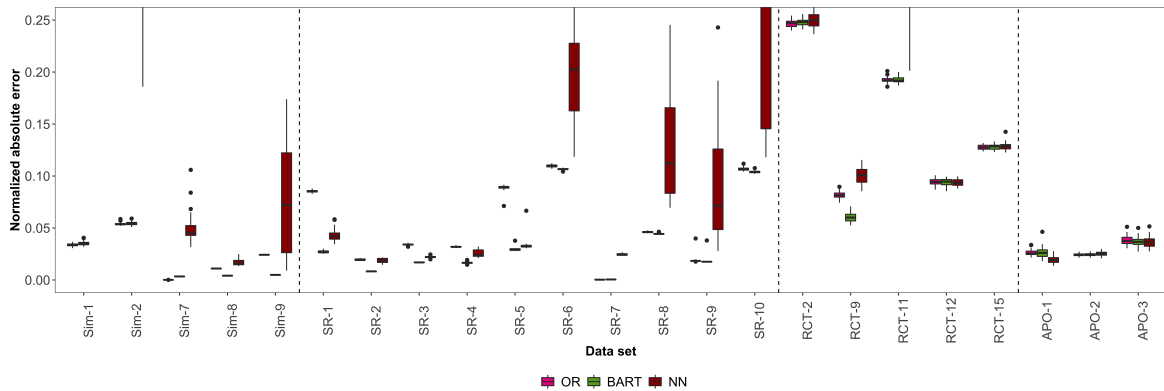

Figure 6: Normalized absolute error in estimating a continuous outcome, zoomed in to show details



440  
441  
442  
443  
444  
445  
446  
447  
448  
449  
450  
451  
452  
453  
454  
455  
456  
457  
458  
459  
460  
461  
462  
463  
464  
465  
466  
467  
468  
469  
470  
471  
472  
473  
474  
475  
476  
477  
478  
479  
480  
481  
482  
483  
484  
485  
486  
487  
488  
489  
490  
491  
492  
493  
494

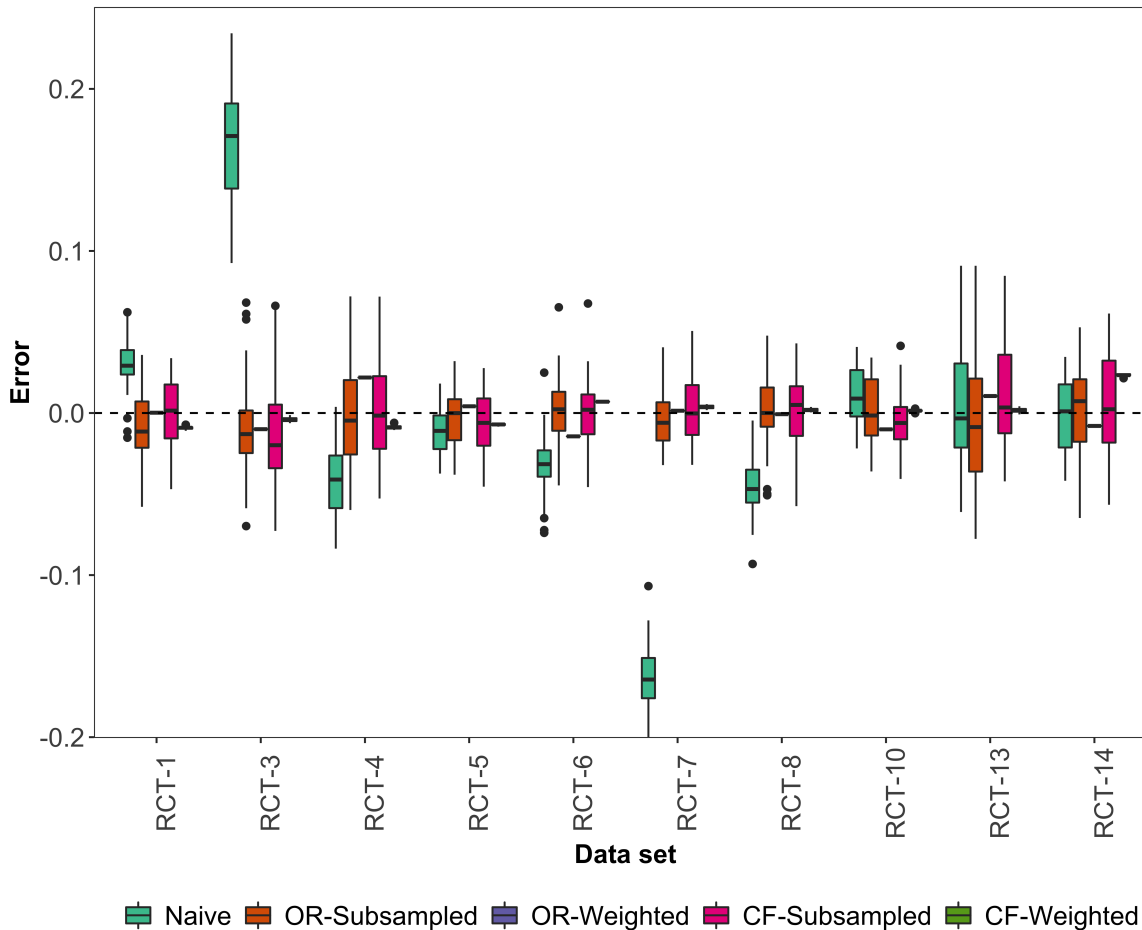

Figure 7: Comparison between weighting and sub-sampling approach in estimating a binary outcome

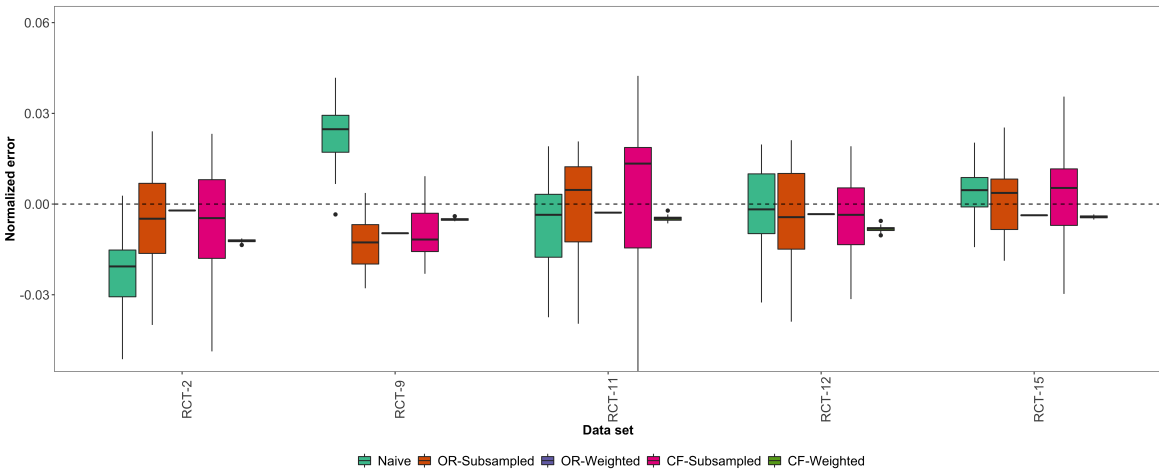

Figure 8: Comparison between weighting and sub-sampling approach in estimating a continuous outcome

495  
496  
497  
498  
499  
500  
501  
502  
503  
504  
505  
506  
507  
508  
509  
510  
511  
512  
513  
514  
515  
516  
517  
518  
519  
520  
521  
522  
523  
524  
525  
526  
527  
528  
529  
530  
531  
532  
533  
534  
535  
536  
537  
538  
539  
540  
541  
542  
543  
544  
545  
546  
547  
548  
549

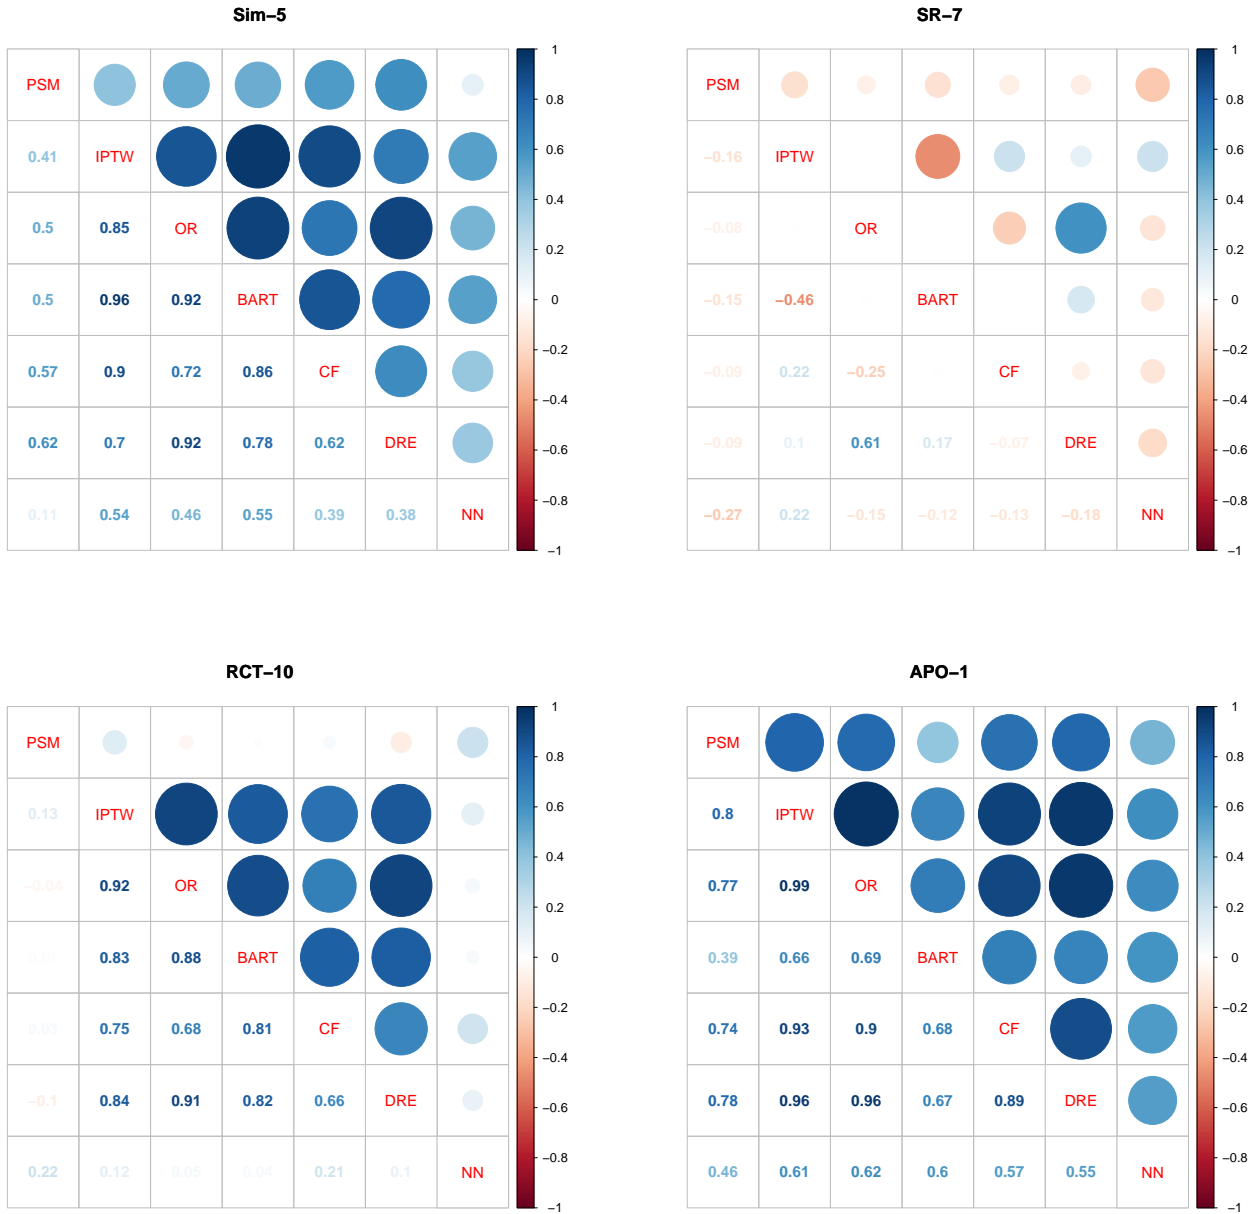

Figure 9: Correlation matrices for four data sets. In most cases, error is highly correlated

550  
551  
552  
553  
554  
555  
556  
557  
558  
559  
560  
561  
562  
563  
564  
565  
566  
567  
568  
569  
570  
571  
572  
573  
574  
575  
576  
577  
578  
579  
580  
581  
582  
583  
584  
585  
586  
587  
588  
589  
590  
591  
592  
593  
594  
595  
596  
597  
598  
599  
600  
601  
602  
603  
604

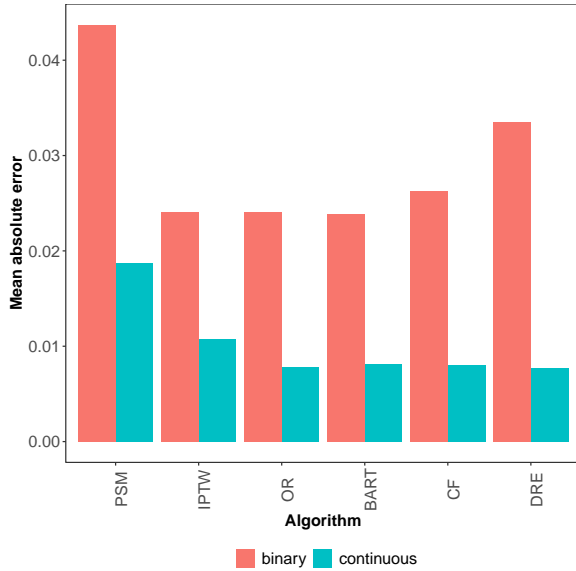

Figure 10: Overall mean absolute error by algorithm

Dryad, 2020. URL <https://datadryad.org/stash/>. [Online; accessed 3-June-2020].

Funk, M. J., Westreich, D., Wiesen, C., Stürmer, T., Brookhart, M. A., and Davidian, M. Doubly robust estimation of causal effects. *American Journal of Epidemiology*, 173(7):761–767, 2011.

Gentzel, A., Garant, D., and Jensen, D. The case for evaluating causal models using interventional measures and empirical data. In *Advances in Neural Information Processing Systems 32*, pp. 11722–11732. 2019.

Guillaume, F. and Rougemont, J. Nemo: an evolutionary and population genetics programming framework. *Bioinformatics*, 22:2256–2557, 2006.

Johansson, F., Shalit, U., and Sontag, D. Learning representations for counterfactual inference. In *International conference on machine learning*, pp. 3020–3029. PMLR, 2016.

Louizos, C., Shalit, U., Mooij, J. M., Sontag, D., Zemel, R., and Welling, M. Causal effect inference with deep latent-variable models. In *Advances in Neural Information Processing Systems*, pp. 6446–6456, 2017.

Miller, J., Hsu, C., Troutman, J., Perdomo, J., Zrnica, T., Liu, L., Sun, Y., Schmidt, L., and Hardt, M. Whynot, 2020. URL <https://doi.org/10.5281/zenodo.3875775>.

National Institute of Diabetes and Digestive and Kidney Diseases (NIDDK) Central Repository, 2020. URL <https://repository.niddk.nih.gov/home/>. [Online; accessed 3-June-2020].

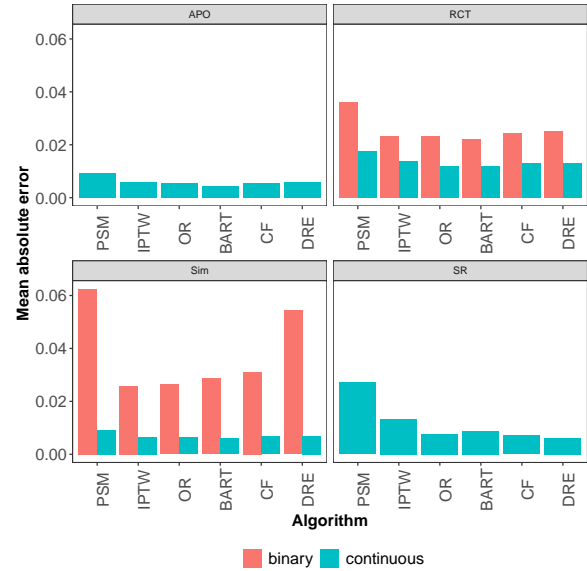

Figure 11: Overall mean absolute error by algorithm, by source of data

NIH National Institute on Drug Abuse Data Share Website, 2020. URL <https://datashare.nida.nih.gov/>. [Online; accessed 3-June-2020].

Project Data Sphere, 2020. URL <https://www.projectdatasphere.org/>. [Online; accessed 3-June-2020].

Rosenbaum, P. R. and Rubin, D. B. The central role of the propensity score in observational studies for causal effects. *Biometrika*, 70(1):41–55, 1983.

Schwab, P., Linhardt, L., and Karlen, W. Perfect match: A simple method for learning representations for counterfactual inference with neural networks. *arXiv preprint arXiv:1810.00656*, 2018.

Shalit, U., Johansson, F. D., and Sontag, D. Estimating individual treatment effect: generalization bounds and algorithms. In *International Conference on Machine Learning*, pp. 3076–3085. PMLR, 2017.

Shi, C., Blei, D. M., and Veitch, V. Adapting neural networks for the estimation of treatment effects. In *Advances in Neural Information Processing Systems*, pp. 2503–2513, 2019.

Shimoni, Y., Yanover, C., Karavani, E., and Goldschmidt, Y. Benchmarking framework for performance-evaluation of causal inference analysis. *arXiv preprint arXiv:1802.05046*, 2018.

---

605 The Knowledge Network for Biocomplexity, 2020. URL  
606 <https://knb.ecoinformatics.org/>. [Online; accessed 3-June-  
607 2020].

608 The National Institute of Mental Health Data Archive  
609 (NDA), 2020. URL <https://nda.nih.gov/>. [Online; ac-  
610 cessed 3-June-2020].

611 Tu, R., Zhang, K., Bertilson, B., Kjellstrom, H., and Zhang,  
612 C. Neuropathic pain diagnosis simulator for causal dis-  
613 covery algorithm evaluation. In *Advances in Neural Infor-*  
614 *mation Processing Systems 32*, pp. 12793–12804. 2019.

615 UK Data Service, 2020. URL <https://ukdataservice.ac.uk/>.  
616 [Online; accessed 3-June-2020].

617 University of Michigan Institute for Social Research, 2020.  
618 URL <https://www.icpsr.umich.edu/web/pages/>. [Online;  
619 accessed 3-June-2020].

620 Vivli Center for Global Clinical Research Data, 2020. URL  
621 <https://vivli.org/>. [Online; accessed 3-June-2020].

622 Wager, S. and Athey, S. Estimation and inference of hetero-  
623 geneous treatment effects using random forests. *Journal*  
624 *of the American Statistical Association*, 2017.

625 Yale Institution for Social and Policy Studies Data Archive,  
626 2020. URL <https://isps.yale.edu/research/data>. [Online;  
627 accessed 3-June-2020].

628 Yoon, J., Jordan, J., and Van Der Schaar, M. Ganite: Estima-  
629 tion of individualized treatment effects using generative  
630 adversarial nets. In *International Conference on Learning*  
631 *Representations*, 2018.

632  
633  
634  
635  
636  
637  
638  
639  
640  
641  
642  
643  
644  
645  
646  
647  
648  
649  
650  
651  
652  
653  
654  
655  
656  
657  
658  
659
